# Supplementary material
Source: publisher site journal article supplement (https://www.spandidos-publications.com/8334/downloadSupplementary)
Supplement: Supplementary file 1 [file downloadSupplementary]

## Sheet: Table SIV
Table SIV. Results of quality assessment by Quality Assessment of Diagnostic Accuracy Studies-2.
Title	Domain	Signaling questions	Risk of bias	Applicability concerns
Differential diagnosis of osteoblastic metastases from bone islands in patients with lung cancer by single-source dual-energy CT: Advantages of spectral CT imaging	1. Patient selection	- Consecutive/random sample? Unclear (retrospective design).	High	Low
		- Case-control avoided? Yes (prospective cohort not used, but no explicit control group).
		- Inappropriate exclusions? No (clear criteria, but atypical lesions excluded).
	2. Index test	- Blind interpretation? Yes (blinded to reference standard).	Low	Low
		- Pre-specified threshold? No (optimal cut-offs derived post-hoc).
	3. Reference standard	- Correct classification? Unclear (no pathology; reliance on imaging follow-up).	High	Moderate
		- Blind interpretation? Yes (reference standard independent of index test).
	4. Flow and timing	- Appropriate interval? Yes (≥6 months follow-up).	Low	Low
		- Same reference standard? Yes (consistent use of scintigraphy/PET-CT + CT).
		- All included in analysis? Yes (exclusions clearly reported).
Deep neural network based artificial intelligence assisted diagnosis of bone scintigraphy for cancer bone metastasis	1. Patient selection	- Consecutive/random sample? Unclear (retrospective, exclusion criteria detailed).	Moderate	Low
		- Case-control avoided? Yes (no explicit control group).
		- Inappropriate exclusions? No (exclusions justified).
	2. Index test	- Blind interpretation? Yes (AI blinded to reference standard).	Low	Low
		- Pre-specified threshold? No (AUC/ROC derived post-hoc).
	3. Reference standard	- Correct classification? Unclear (no pathology; clinical/imaging follow-up).	Moderate	Moderate
		- Blind interpretation? Yes (reference independent of AI results).
	4. Flow and timing	- Appropriate interval? Yes (follow-up ≥6 months).	Low	Low
		- Same reference standard? Yes (consistent follow-up protocols).
		- All included in analysis? Yes (exclusions documented).
Automatic identification of suspicious bone metastatic lesions in bone scintigraphy using convolutional neural network	1. Patient selection	- Consecutive/random sample? Unclear (retrospective, single-center).	Moderate	Low
		- Case-control avoided? Yes (no explicit control group).
		- Inappropriate exclusions? No (all visible lesions included).
	2. Index test	- Blind interpretation? Yes (AI blinded to reference standard).	Low	Low
		- Pre-specified threshold? No (AUC/ROC derived post-hoc).
	3. Reference standard	- Correct classification? Unclear (no pathology; clinical/imaging follow-up).	Moderate	Moderate
		- Blind interpretation? Yes (reference independent of AI results).
	4. Flow and timing	- Appropriate interval? Yes (follow-up imaging used).	Low	Low
		- Same reference standard? Yes (consistent follow-up protocols).
		- All included in analysis? Yes (fivefold cross-validation).
Deep learning-based algorithm improves radiologists’ performance in lung cancer bone metastases detection on computed tomography	1. Patient Selection	- Consecutive/random sample: No (retrospective).	Low	Low (patients matched the intended use of the index test).
		- Case-control design avoided: Yes.
		- Inappropriate exclusions: No (exclusions justified).
	2. Index Test	- Blind interpretation: Yes (radiologists blinded to DCNN results in observer study).	Low	Low (DCNN aligns with clinical use for LCBM detection).
		- Pre-specified threshold: Yes (IoU > 0.5).
	3. Reference Standard	- Correct classification: Yes (annotations by experienced radiologists).	Low	Low (ground truth matches target condition).
		- Blind interpretation: Yes (reference standard independent of index test).
	4. Flow & Timing	- Appropriate interval: N/A (single-timepoint retrospective study).	Low	Low (no time-related biases).
		- Same reference standard: Yes.
		- All patients included: Yes (no post-enrollment exclusions).
CT-based radiomics and clinical characteristics for predicting bone metastasis in lung adenocarcinoma patients	1. Patient selection	- Consecutive/random sample: No (retrospective).	Low	Low (patients matched the intended use of the index test).
		- Case-control design avoided: Yes.
		- Inappropriate exclusions: No (exclusions justified).
	2. Index test	- Blind interpretation: Yes (radiomics features extracted independently of reference standard).	Low	Low (radiomics aligns with clinical use for BM prediction).
		- Pre-specified threshold: Yes (LASSO for feature selection).
	3. Reference standard	- Correct classification: Yes (BM confirmed by imaging/biopsy).	Low	Low (ground truth matches target condition).
		- Blind interpretation: Yes (reference standard independent of index test).
	4. Flow and timing	- Appropriate interval: Yes (follow-up every 6 months).	Low	Low (no time-related biases).
		- Same reference standard: Yes.
		- All patients included: Yes (no post-enrollment exclusions).
Automated Diagnosis of Bone Metastasis by Classifying Bone Scintigrams Using a Self-defined Deep Learning Model	1. Patient selection	- Consecutive/random sample: No (retrospective).	Low	Low (patients matched the intended use of the index test).
		- Case-control design avoided: Yes.
		- Inappropriate exclusions: No (exclusions justified).
	2. Index test	- Blind interpretation: Yes (model trained/validated independently of reference standard).	Low	Low (CNN aligns with clinical use for bone metastasis detection).
		- Pre-specified threshold: Yes (Softmax for classification).
	3. Reference standard	- Correct classification: Yes (expert annotations + diagnostic reports).	Moderate	Low (ground truth matches target condition).
		- Blind interpretation: No (annotators aware of clinical context).
	4. Flow and timing	- Appropriate interval: N/A (single-timepoint images).	Low	Low (no time-related biases).
		- Same reference standard: Yes.
		- All patients included: Yes (no post-enrollment exclusions).
QUADAS‑2, Quality Assessment of Diagnostic Accuracy Studies‑2; AUC, area under the curve; ROC, receiver operating characteristic; CT, computed tomography; PET‑CT, positron emission tomography–computed tomography; AI, artificial intelligence; CNN, convolutional neural network; DCNN, deep convolutional neural network; LCBM, lung cancer bone metastases; LASSO, least absolute shrinkage and selection …
